1 **Diagnosis of Human Leptospirosis: High Resolution Melting Analysis for Direct**  
2 **Detection of *Leptospira* in the Early Stage of the Disease in a Clinical Setting**

3 Lisa M. Esteves<sup>1</sup>, Sara M. Bulhões<sup>1</sup>, Claudia C. Branco<sup>1,2,3</sup>, Teresa Carreira<sup>4</sup>, Maria L.  
4 Vieira<sup>4</sup>, Maria Gomes-Solecki<sup>5</sup> & Luisa Mota-Vieira<sup>1,2,3\*</sup>

5  
6 **Affiliations:**

7 <sup>1</sup>Molecular Genetics and Pathology Unit, Hospital of Divino Espírito Santo of Ponta  
8 Delgada, EPER, São Miguel Island, Azores, Portugal. <sup>2</sup>Azores Genetics Research Group,  
9 Instituto Gulbenkian de Ciência, Oeiras, Portugal. <sup>3</sup>Centre for Biodiversity, Functional and  
10 Integrative Genomics, Faculty of Sciences, University of Lisboa, Portugal. <sup>4</sup>Global Health  
11 and Tropical Medicine (GHTM), Instituto de Higiene e Medicina Tropical (IHMT),  
12 Universidade Nova de Lisboa (UNL), Portugal. <sup>5</sup>Department of Microbiology, Immunology  
13 and Biochemistry, The University of Tennessee Health Science Center, Memphis,  
14 Tennessee, USA.

15  
16 **\*Corresponding author:**

17 Luisa Mota-Vieira, PhD  
18 Molecular Genetics and Pathology Unit  
19 Hospital of Divino Espírito Santo of Ponta Delgada, EPER  
20 Avenida D. Manuel I  
21 9500-782 Ponta Delgada  
22 São Miguel Island, Azores – Portugal  
23 Phone: +351 296 203 531  
24 Fax: +351 296 203 090  
25 E-mail: Luisa.MQ.Vieira@azores.gov.pt

26 Currently, the direct detection of *Leptospira* infection can be done in clinical laboratories by  
27 a conventional nested polymerase chain reaction method (nested PCR), which is  
28 labourious and time-consuming. To overcome these drawbacks, we tested a set of paired  
29 samples of serum and urine from 202 patients presenting at a hospital located in an area  
30 endemic for leptospirosis using high resolution melting (HRM). The results were compared  
31 with those obtained by nested PCR for direct detection of the pathogen in both specimens  
32 and with the gold standard test used for indirect detection of anti-*Leptospira* antibodies in  
33 serum (the microscopic agglutination test, MAT). The HRM assay results were positive for  
34 46/202 (22.7%) samples, whereas 47/202 (23.3%) samples were positive by nested PCR.  
35 As expected in recently infected febrile patients, MAT results were positive in only 3/46  
36 (6.5%) HRM-positive samples. We did a unique comparative analysis using a robust  
37 biobank of paired samples of serum and urine from the same patient to validate the HRM  
38 assay for molecular diagnosis of human leptospirosis in a clinical setting. This assay fills a  
39 void unmet by serologic assays as it can detect the presence of *Leptospira* in biological  
40 samples even before development of antibody takes place.

41

## 42 **Introduction**

43 Leptospirosis is a worldwide zoonotic and neglected infectious disease caused by  
44 pathogenic bacteria of the *Leptospira* genus from the family Leptospiraceae<sup>1</sup>. This disease  
45 is known for its endemicity mainly in countries with a humid tropical or subtropical climate,  
46 such as Brazil, India and Portugal (Azores Islands)<sup>2</sup>. The infection is associated with a  
47 variety of clinical manifestations, ranging from flu-like symptoms to multiple organ failure  
48 and death. As a result, the disease is often difficult to diagnose clinically, and laboratory  
49 support is essential<sup>3</sup>. Treatment with appropriate antibiotics should be initiated as early as  
50 possible after laboratory confirmation; however, the majority of patients suspected to have  
51 leptospirosis are treated empirically with broad-spectrum antibiotics effective against most  
52 bacteria before a definitive diagnosis is established. At the Hospital of Divino Espírito Santo  
53 of Ponta Delgada (HDES), located on São Miguel Island (Azores), *Leptospira* infection is  
54 confirmed in the laboratory by identifying the presence of specific fragments of *Leptospira*  
55 DNA in patient samples (serum and urine) through conventional nested polymerase chain  
56 reaction (nested PCR)<sup>4,5</sup>. This method is time-consuming (it takes approximately 5 hours)  
57 and is sometimes too slow to support the clinical decision for antibiotic therapy.

58 Current techniques to detect *Leptospira* infection are evolving from conventional  
59 PCR to real-time PCR, which is faster, tends to have higher sensitivity and specificity at  
60 detecting pathogenic *Leptospira* species and is performed in a closed system that reduces  
61 the risk of DNA cross-contamination<sup>6</sup>. An emerging technique for clinical diagnosis is high  
62 resolution melting (HRM) analysis. HRM was first described by Carl Wittwer's group for  
63 mutation screening<sup>7</sup>, and the underlying principle is the generation of different melting curve  
64 profiles due to sequence variations in double-stranded DNA. HRM is typically performed  
65 with a real-time PCR instrument immediately after PCR. Advantages of this method include  
66 a rapid turn-around time (less than 2hr), a closed-tube format that significantly reduces

67 contamination risk, high sensitivity and specificity, low cost and, unlike other methods, no  
68 sample processing or separations after PCR<sup>8</sup>. Furthermore, HRM is a non-damaging  
69 method that enables the subsequent analysis of the sample by other methods, such as  
70 DNA sequencing or gel electrophoresis<sup>9</sup>.

71 In a clinical diagnostic context, HRM has been validated for the detection of  
72 oncogene mutations<sup>10</sup>, human malaria diagnosis<sup>11</sup>, species differentiation and genotyping  
73 within microbial species<sup>12</sup>, but not diagnosis of human leptospirosis. Recently, two studies  
74 described an HRM method for typing *Leptospira* strains at the species and subspecies  
75 levels<sup>13,14</sup>; the method described in the first study can accurately discriminate *L.*  
76 *interrogans*, *L. kirschneri*, *L. borgpetersenii* and *L. mayottensis* with a specificity and  
77 reproducibility of 100% and less than 0.5% variation in the melting temperature ( $T_m$ )  
78 coefficient<sup>13</sup>. The second study describes a PCR-HRM assay that targets the 16S ribosomal  
79 gene to identify *Leptospira* species from isolated cultures<sup>14</sup>. However, in both studies, HRM  
80 was not evaluated in patient samples as a clinical diagnostic test for human leptospirosis.

81 The aim of the present work was to evaluate a diagnostic assay for human  
82 leptospirosis capable of providing timely laboratory results on the same day the patient is  
83 seen at the emergency room. To address this unmet need, we used a robust biobank of  
84 paired serum and urine samples and evaluated the accuracy of HRM analysis as a clinical  
85 diagnostic tool for direct detection of *Leptospira* in the very early stage of human  
86 leptospirosis.

87

## 88 **METHODS**

89 **Ethical considerations.** The present study followed international ethical guidelines and  
90 was evaluated and approved by the Health Ethics Committee of the HDES (Ref.  
91 HDES/CES/159/2009). The analysis of retrospective samples (serum and urine) from

92 patients suspected of having leptospirosis was exempted from the need to obtain informed  
93 consent under the regulations of the Portuguese Data Protection Commission – law  
94 12/2005 article 19, number 6 ([https://www.cnpd.pt/bin/orientacoes/DEL227-2007-  
95 ESTUDOS-CLINICOS.pdf](https://www.cnpd.pt/bin/orientacoes/DEL227-2007-ESTUDOS-CLINICOS.pdf), accessed February 22, 2017).

96

97 **Study design.** The present work is a retrospective hospital-based study that includes  
98 samples from patients suspected of leptospirosis infection who mainly presented at the  
99 Emergency Department (n = 167, 82.7%) of the Hospital of Divino Espírito Santo of Ponta  
100 Delgada in São Miguel, Azores, a Portuguese island in which leptospirosis is endemic. A  
101 total of 202 patients were investigated from January 2015 to June 2016 (Supplementary  
102 Table S1). The mean patient age was 48.2 ( $\pm 16.4$ ) years. Higher rates of males (89.6%),  
103 farmers (20.3%) and unemployed persons (13.4%) were observed in the study population.  
104 Clinical diagnosis by the attending physician was based on signs and symptoms of  
105 leptospirosis, as previously described<sup>15,16</sup>. Briefly, physicians looked for epidemiological  
106 context, such as rural activities and direct contact with contaminated areas (rat urine), and  
107 clinical manifestations, including fever, myalgia, jaundice and coluria, before collecting  
108 biological samples (serum and urine) for molecular detection/confirmation of *Leptospira*  
109 spp. We centrifuged all sera and urine samples at 2000 rpm for 10 minutes. Bacterial DNA  
110 was automatically extracted from 400  $\mu$ l of independent samples of serum (S1 and S2) and  
111 urine (U1 and U2) from each patient using the BioRobot EZ1 Advanced System (Qiagen). A  
112 total of 808 samples were processed.

113

114 **Reference molecular test (conventional nested PCR).** Conventional nested PCR was  
115 considered the reference standard for *Leptospira* spp. DNA detection in the present study.  
116 After automatic bacterial DNA extraction, the *rrs* (16S rRNA) gene was amplified as

117 previously described<sup>4,5</sup> by conventional nested PCR in a Biometra® T-Gradient thermal  
118 cycler. We used two primer sets: forward-A 5'–GGCGGCGCGTCTTAAACATG–3' and  
119 reverse-B 5'–TTCCCCCATTGAGCAAGATT–3' for the first PCR; nested-A 5'–  
120 TGCAAGTCAAGCGGAGTAGC–3' and nested-B 5'–TTCTTAACTGCTGCCTCCCG–3' for  
121 the nested PCR. The first PCR reaction contained 5 µl of bacterial DNA, 10 µM primers A  
122 and B, 100 µM dNTPs (Promega), 25 nM MgCl<sub>2</sub> (Qiagen), 1X Q-Solution (Qiagen), 1X  
123 buffer (Qiagen), 5 U of HotStart Taq (Qiagen) and RNase-free water to a final volume of 50  
124 µl. The PCR programme started with an enzyme activation step at 95°C for 15 minutes;  
125 proceeded with 30 cycles of 94°C for 1 minute, 63°C for 1 minute and 72°C for 1 minute;  
126 and ended with a final extension step at 72°C for 10 minutes. The nested PCR (2<sup>nd</sup> round)  
127 used 5 µl of the first-round PCR product and 10 µM nested-A and nested-B primers. The  
128 first cycle consisted of denaturation at 95°C for 15 minutes, followed by 30 cycles of  
129 denaturation at 94°C for 1 minute, primer annealing at 63°C for 1 minute, and extension at  
130 72°C for 1 minute, with an additional step at 72°C for 10 minutes at the end, resulting in a  
131 292 bp fragment. Amplified *Leptospira* DNA was visualized in an UV transilluminator  
132 instrument (BioRad) after agarose gel electrophoresis (3%). A patient was defined as  
133 having a laboratory-confirmed case of leptospirosis when *Leptospira* DNA was detected in  
134 at least one serum (S1 or S2) or urine (U1 or U2) sample.

135

136 **High resolution melting (HRM) analysis.** Primer pairs for HRM analysis were chosen  
137 according to the results obtained by Naze *et al*<sup>13</sup>. We used the following LFB1 F/R and  
138 G1/G2 primers to amplify the *lfb1* and *secY* genes, respectively: LFB1-F 5'–  
139 CATTGATGTTTCGAATCATTTCAAA–3' and LFB1-R 5'–GGCCCAAGTTCCTTCTAAAAG–  
140 3', and G1 5'–CTGAATCGCTGTATAAAAGT–3' and G2 5'–  
141 GGAAAACAAATGGTTCGGAAG–3'. The 15 µl reactions contained 7.5 µl of 2X Type-it HRM

142 master mix (Qiagen), 0.7  $\mu$ M final concentration of each primer (TibMolBiol), 3.75  $\mu$ l of  
143 extracted bacterial DNA, and RNase-free water to a final volume of 15  $\mu$ l. We performed the  
144 following amplification protocol in the 7500 Fast Real-Time PCR instrument (Applied  
145 Biosystems): denaturation at 95°C for 5 minutes, followed by 45 cycles of 95°C for 10  
146 seconds, 55°C for 30 seconds, and 72°C for 10 seconds. These conditions were used for  
147 both primer sets. After PCR cycling, the samples were heated from 70°C to 95°C with  
148 continuous data acquisition.

149 We used six pathogenic *Leptospira* reference cultures provided by the Portuguese  
150 Reference Laboratory for Leptospirosis (at the Instituto de Higiene e Medicina Tropical,  
151 IHMT, of the Universidade Nova de Lisboa) as positive controls: 4 strains belonging to *L.*  
152 *interrogans* serogroup (sg) Icterohaemorrhagiae, *L. borgpetersenii* sg Ballum, *L. kirschneri*  
153 sg Cynopteri and *L. noguchii* sg Panama and 2 human Azorean isolates<sup>4</sup> belonging to *L.*  
154 *interrogans* serovar (sv) Copenhageni of Icterohaemorrhagiae sg (human isolate 1) and *L.*  
155 *borgpetersenii* sv Arborea of Ballum sg (human isolate 6). Melting curve plots were  
156 generated and analysed using High Resolution Melt software v3.0.1 (Applied Biosystems)  
157 to determine average melting temperature ( $T_m$ ) for each *Leptospira* spp.

158

159 **HRM benchmarking confirmation by Sanger sequencing.** To validate the HRM analysis,  
160 we selected 18 biological specimens (13 serum and 5 urine samples) from laboratory-  
161 confirmed leptospirosis patients, including the sample positive by nested PCR and negative  
162 by HRM analysis. As reference DNA sequences, we used two *Leptospira* spp. (*L.*  
163 *interrogans* sg Icterohaemorrhagiae and *L. borgpetersenii* sg Ballum) and two human  
164 isolates. Amplified DNA products of *Leptospira* obtained by nested PCR were purified using  
165 the QIAquick PCR Purification Kit (Qiagen) according to the manufacturer's instructions.  
166 Sequencing was performed using the nested-A and nested-B primer pair with the BigDye

167 Terminator v1.1 cycle sequencing kit (Applied Biosystems) under the following conditions: 2  
168 µl of ready reaction mix, 4 µl of BigDye sequencing buffer, 3.2 pmol of each primer pair, 7  
169 ng of DNA, and RNase-free water to a final reaction volume of 20 µl. The cycling  
170 programme included an initial denaturation step at 96°C for 1 minute, followed by 25 cycles  
171 of 96°C for 10 seconds, 50°C for 5 seconds and 60°C for 4 minutes, in a GeneAmp® PCR  
172 System 2700 (Applied Biosystems). The sequencing products were purified with a BigDye  
173 XTerminator® Purification Kit (Applied Biosystems) and separated by capillary  
174 electrophoresis in an automated sequencer (ABI 3130 Genetic Analyzer, Applied  
175 Biosystems) with a 36 cm capillary and POP-7™ polymer according to the manufacturer's  
176 instructions. Data were analysed with Sequencing Analysis software v5.3.1 (Applied  
177 Biosystems). Sequences were aligned using Bioedit™ software v7.0.0.

178

179 **Microscopic agglutination test (MAT).** A total of 46 serum samples evaluated as positive  
180 by the molecular approach were aliquoted and stored at -20°C for further detection of  
181 anti-*Leptospira* spp. antibodies by MAT. Additionally, 20 negative serum samples were  
182 selected as controls. MAT was performed at the Portuguese Reference Laboratory for  
183 Leptospirosis (IHMT, Universidade Nova de Lisboa) using a battery of 25 live pathogenic  
184 serovars (including 4 Azorean isolates) representative of 15 serogroups of pathogenic  
185 *Leptospira* and a saprophytic serovar of *L. biflexa* as an internal control. Samples were  
186 initially screened at a 1:40 dilution, and reactive sera were further diluted in a 2-fold series  
187 to the endpoint, defined as the highest serum dilution that agglutinated at least 50% of  
188 leptospire. For the Azorean endemic region, samples were considered positive when titres  
189 were 1:160 or greater, not conclusive when titres were below 1:160 (cut-off), and negative  
190 when no agglutination was observed.

191



192 **Statistical analysis.** The nested PCR test was used as the reference molecular test to  
193 calculate the sensitivity, specificity, positive and negative predictive values (PPV and NPV),  
194 and overall accuracy [with the 95% confidence interval (CI)]. Calculations were performed  
195 using Vassar College's VassarStats Website for Statistical Computation  
196 (<http://www.vassarstats.net>, last accessed November 10, 2017). To determine whether  
197 there was a significant difference between the diagnostic tests for *Leptospira* detection,  
198 data were analysed by McNemar's test, and  $p < 0.05$  indicated statistical significance. The  
199 Standards for Reporting of Diagnostic Accuracy (STARD) statement was followed when  
200 reporting the results of the present study<sup>17</sup>.

201

## 202 **Results**

203 **HRM assay.** The HRM assay was able to successfully distinguish 4 *Leptospira* spp. (*L.*  
204 *interrogans* sg Icterohaemorrhagiae, *L. borgpetersenii* sg Ballum, *L. kirschneri* sg Cynopteri  
205 and *L. noguchii* sg Panama) and the 2 human *Leptospira* isolates (HI1 and HI6). As shown  
206 in the derivative plot (Fig. 1), the LFB1 F/R and G1/G2 primer sets produced distinct melting  
207 curve profiles for reference *Leptospira* strains of *L. interrogans* and *L. borgpetersenii* spp.  
208 that matched those of the human *Leptospira* isolates (HI1 and HI6) of the same species.  
209 The  $T_m$  values obtained for LFB1 F/R were 80.71°C (*L. interrogans*), 81.84°C (*L. noguchii*),  
210 82.31°C (*L. kirschneri*) and 83.26°C (*L. borgpetersenii*), and those for G1/G2 were 78.61°C  
211 (*L. noguchii*), 79.10°C (*L. interrogans*), 79.19°C (*L. kirschneri*) and 81.50°C (*L.*  
212 *borgpetersenii*). Moreover, these results were reproducible across 10 independent melt  
213 curve runs.

214

215 **HRM screening of samples from patients suspected of having leptospirosis.** We  
216 screened 808 clinical specimens (404 serum and 404 urine; paired samples from 202

217 patients) using HRM analysis. The average  $T_m$  with the LFB1 F/R primers was 80.94°C in  
218 28 (60.9%) and 83.84°C in 16 (39.1%) patients (Supplementary Table S2). The average  $T_m$   
219 with the G1/G2 primers was 79.36°C in 28 (60.9%) and 81.82°C in 18 (39.1%) patients. For  
220 both primer sets, we found one clinical sample to be positive by nested PCR and negative  
221 by HRM. The  $T_m$  obtained with *Leptospira* spp. and the melting curve profile results were  
222 consistent for the remaining patient samples (Fig. 2). We clustered the melting curves in  
223 two groups and identified the *Leptospira* spp. in the patient samples by comparing the  $T_m$   
224 values to those of the six *Leptospira* positive controls.

225

226 **Kinetics of disease progression based on *Leptospira* detection.** We evaluated paired  
227 serum and urine samples from 202 patients clinically suspected of having *Leptospira* spp.  
228 infection by nested PCR and HRM (Table 1). The nested PCR results were positive for  
229 23.3% (47/202) patients and negative for 76.7% (155/202). Using HRM, the results were  
230 positive for 22.7% (46/202) patients and negative for 77.2% (156/202). The discrepant  
231 result between the two molecular assays was confirmed to be a false positive by  
232 sequencing (see below). HRM produced conclusive results in about half of the time (~2hr)  
233 needed to generate nested PCR results (usually ~5hr).

234 Based on the results of the laboratory-confirmed leptospirosis cases (n = 46), we  
235 established the kinetic profiles of disease progression (Table 2). Profile A characterizes  
236 patients who had a positive molecular result in serum and a negative result in urine, which  
237 represents early dissemination of *Leptospira* in blood. In Profile B patients were positive in  
238 both serum and urine, which represents the transit of *Leptospira* infection to the kidney and  
239 other tissues. Profile C corresponds to patients who were positive in urine and negative in  
240 serum, which represents the *Leptospira* excretion stage. The highest percentage of patients  
241 analysed by nested PCR (60.9%) and HRM (47.8%) fell under profile B, positive for both

242 serum and urine. The profile analysis also revealed differences between HRM and MAT,  
243 which is in accordance with the kinetics of leptospirosis progression.

244

245 **Sequencing analysis.** To benchmark *Leptospira* detection by HRM analysis, we performed  
246 Sanger sequencing (Fig. 3). The obtained bacterial DNA sequences confirmed the positive  
247 HRM results in 17 clinical samples. One sample (#18) was positive in the urine by nested  
248 PCR but negative by HRM. This sample was assessed twice by sequencing, HRM and  
249 nested PCR, and the sequence had a 97% match to *Collinsella aerofaciens*, which is found  
250 predominantly in the human gut. For the remaining samples (17/18), we observed a perfect  
251 match with the reference sequences regarding  $T_m$  values, melting curve profiles, and  
252 sequencing data.

253

254 **Microscopic agglutination test (MAT).** MAT results revealed that of the 46 nested PCR-  
255 positive patients, only 3 presented specific anti-*Leptospira* antibodies (6.5%), and 3  
256 presented anti-*Leptospira* antibodies below the cut-off titre adopted by the Portuguese  
257 Reference Laboratory for Leptospirosis in the Azorean endemic region (Table 3).

258

259 **Analytical specificity and sensitivity of HRM.** To validate the HRM analysis as a  
260 diagnostic method for *Leptospira* spp. detection, we assessed the accuracy parameters by  
261 comparing the results of nested PCR (reference molecular test) after sequencing with those  
262 obtained by HRM (Table 4). Of the 46 patients who were positive for leptospirosis by nested  
263 PCR, 46 had a positive HRM result, for a sensitivity of 1.00 (95% CI: 0.90–1.00). Moreover,  
264 of the 156 patients who were negative for leptospirosis by nested PCR, 156 had a negative  
265 HRM result, for a specificity of 1.00 (95% CI: 0.97-1.00). The PPV and NPV were 1.00  
266 (95% CI: 0.90–1.00) and 1.00 (95% CI: 0.97-1.00), respectively. Overall, HRM accuracy

267 was 100%. Together, these results confirm and validate the accuracy of HRM as a clinical  
268 diagnostic test for human leptospirosis.

269

270 **Comparison between HRM and other molecular PCR and serological diagnostic**  
271 **assays for leptospirosis.** The current study is the first one to present 100% accuracy  
272 values – specificity, sensitivity, Positive Predictive Values (PPV) and Negative Predictive  
273 Values (NPV) – for a molecular PCR method, validating the HRM as the best test to be  
274 implemented in a clinical setting. No other molecular test has provided PPVs and NPVs  
275 (Table 4). Compared with serological methods, HRM has the highest diagnostic value as it  
276 can be used to detect *Leptospira* directly in biological samples collected in the first days of  
277 the infection, making this test the most reliable to inform treatment decisions for  
278 hospitalized patients and patients seen in emergency rooms or clinics (Table 5).

279

## 280 **Discussion**

281 In this study, the HRM assay was validated for the accurate detection of *Leptospira* DNA in  
282 biological samples from patients presenting in the emergency room of a hospital in the  
283 Azorean island of São Miguel, a Portuguese region endemic for leptospirosis. Among 202  
284 human patients suspected of having leptospirosis, 46 tested positive (22.7%) by both  
285 nested PCR and HRM; among these patients, only 3 tested positive (6.5%) by MAT.  
286 Melting curve profiles with the LFB1 F/R primer set distinguished the 4 *Leptospira* spp., *L.*  
287 *interrogans*, *L. borgpetersenii*, *L. kirschneri* and *L. noguchii*, in cultured bacteria and human  
288 isolates (Fig. 1). These results are in accordance with those obtained by Naze and  
289 colleagues<sup>13</sup>. In addition, template-independent amplifications targeting the two relevant  
290 genes (*lfb1* and *secY*) of pathogenic *Leptospira* spp. also provided a thorough validation of  
291 the present HRM assay. The 404 human samples used – paired serum and urine from 202

292 patients, analysed in duplicated (total of 808 specimens) – validate, for the first time, the  
293 application of HRM as a clinical diagnostic test for human leptospirosis in a clinical setting.

294 The melting curve analysis of *Leptospira* species in patient samples (serum and  
295 urine) accurately discriminated species when positive controls were included in each run  
296 (Fig. 2). According to the  $T_m$ , the HRM assay revealed that 60.9% (28/46) of patients were  
297 infected with leptospires belonging to *L. interrogans*, and 39.1% (18/46) were infected with  
298 leptospires belonging to *L. borgpetersenii* species (Supplementary Table S2). The most  
299 likely explanation for these results is that *L. interrogans* survives longer when exposed to  
300 the environment, which is why it is more prone than *L. borgpetersenii* to infect humans. The  
301 latter does not survive in the environment and is transmitted by direct contact with the  
302 host<sup>18</sup>. MAT is the hundred-year old gold standard method for the serodiagnosis of  
303 leptospirosis and allows for the determination of the presumptive serogroup or serovar of  
304 the infecting strain in routine diagnostics and/or epidemiological studies<sup>19</sup>. In the present  
305 study, MAT results substantiated the HRM findings, as these patients presented anti-  
306 *Leptospira* antibodies belonging to one of these serogroups. In addition, MAT results were  
307 positive in only 3/46 (6.5%) of the HRM-positive samples which is expected in recently  
308 infected febrile patients and explained by the typical delay period between time of infection  
309 and presence of measurable levels of antibodies in blood. Low MAT sensitivity in an early  
310 stage of disease infection was discussed previously<sup>20</sup>. In a clinical diagnostic context, this  
311 observation alone qualifies HRM as a valuable alternative to MAT by providing early  
312 unambiguous diagnosis of the disease, which can better inform treatment decisions by the  
313 physician as recommended by WHO<sup>3</sup>. The HRM method validated in the present study not  
314 only detects *Leptospira* in human biological samples with 100% accuracy, but also informs  
315 epidemiology of the disease by identifying the infecting species.

316 By conducting DNA sequencing as part of the assay validation, we determined that  
317 the leptospire infecting these patients belonged to the serogroups Icterohaemorrhagiae  
318 and Ballum (Fig. 3). These results agree with prior studies performed in the Azores Islands  
319 (São Miguel and Terceira), where the serogroups Icterohaemorrhagiae (*L. interrogans*) and  
320 Ballum (*L. borgpetersenii*) were the most frequent human<sup>4,15</sup> and rodent *Leptospira*  
321 isolates<sup>16,21</sup>.

322 The profiles based on the 46 confirmed positive patients (by nested PCR and HRM)  
323 described in Table 2 are in accordance with the kinetics of *Leptospira* infection and disease  
324 progression in humans<sup>18</sup>. The analysis allows us to identify the illness point at which  
325 patients presented at the hospital. Infection produces leptospiraemia within the first days  
326 after exposure, which is followed by the appearance of leptospire in multiple organs by the  
327 3<sup>rd</sup> day of infection (incubation period and dissemination). Illness develops with the  
328 appearance of agglutinating antibodies 5-14 days after exposure (early phase). Leptospire  
329 are cleared from the bloodstream and organs in the late phase, as serum agglutinating  
330 antibody titres increase<sup>18</sup>. A higher percentage of patients in this study were seen in the  
331 early phase of the disease (profile B, Table 2), when the immune system starts to produce  
332 antibodies and clearing *Leptospira* from the blood, which is why the bacteria is detected in  
333 serum and urine. Another important finding is that HRM is more sensitive than nested PCR  
334 at detecting *Leptospira* during the incubation period (first seven days, profile A). This finding  
335 is of clinical relevance because it allows for the immediate initiation of antibiotic therapy at  
336 the earliest onset. Regarding profile C, 23.4% of patients presented at the hospital when  
337 *Leptospira* DNA is detected in the urine. This delay in coming to the hospital probably  
338 occurs because the symptoms are similar to those of flu, and patients stay at home and  
339 take conventional over-the-counter medicine. For patients with profile C, HRM was more  
340 specific than nested PCR; one patient was positive by nested PCR and negative by HRM.

341 Bacterial DNA sequencing of this patient's urine sample (#18) showed a 97% match to  
342 *Collinsella aerofaciens*, a type of bacteria found in the human gut, proving that the nested  
343 PCR result was a false positive. This finding highlights the caution necessary when  
344 interpreting the results of assays such as nested PCR that target the *rrs* gene (encoding  
345 16S rRNA), which is conserved among many bacterial species, and are thus prone to  
346 cross-reactivity. Extra care should be taken when validating PCR assays based on the *rrs*  
347 gene, especially in urine samples that contain poorly characterized microbial flora, which is  
348 supported by previous observations<sup>22</sup>. The performance of the HRM assay was evaluated  
349 and compared with that of the reference molecular test, nested PCR (Table 4); HRM was  
350 100% accurate. The high specificity (100%) and sensitivity (100%) of HRM in endemic  
351 regions, such as the Azores, is highly relevant. Notably, since the nested PCR technique  
352 was implemented at HDES in 2005, no patient on São Miguel Island has died of  
353 leptospirosis. According to official data in the Azores (the islands of São Miguel and  
354 Terceira) for the period between 1986 and 2002, fewer than 19 deaths due to leptospirosis  
355 were reported each year<sup>16</sup>.

356 In clinical diagnostic laboratories, real-time PCR methods are increasingly being  
357 used instead of conventional PCR methods, providing the opportunity to rapidly confirm  
358 leptospirosis infection in the first days of infection. So far, this is the most comprehensive  
359 study performed for laboratorial diagnosis of human leptospirosis using paired samples of  
360 serum and urine from the same patient. HRM allows for accurate clinical diagnosis of  
361 leptospirosis in just 2 hours, rather than the 5 hours needed for nested PCR, and the results  
362 are unambiguous and easy to interpret. The HRM assay is a robust molecular PCR method  
363 for the diagnosis of human leptospirosis infection in endemic regions and it can be fully  
364 implemented in routine clinical laboratories with real-time PCR equipment. Furthermore,  
365 HRM has the advantage of allowing for the distinction of *Leptospira* species which informs



366 leptospirosis epidemiology in the geographic region without requiring the maintenance of  
367 large strain collections and labourious cultures. Recently, molecular PCR and serological  
368 methods for the diagnosis of human leptospirosis have been published<sup>13, 20, 23-33</sup>. However,  
369 their accuracy values are still below those reported here. An important limitation of these  
370 serological assays is the inability to detect anti-*Leptospira* antibodies in the very early  
371 stages of infection.

372 In conclusion, we did a unique comparative analysis using a robust biobank of paired  
373 samples of serum and urine from the same patient to validate the HRM assay for molecular  
374 diagnosis of human leptospirosis in a clinical setting. As a clinical diagnostic method, it is  
375 imperative to use both primer sets in each run to amplify the *lfb1* and *secY* genes and to  
376 include at least one positive and one negative control. Furthermore, rapidly distinguishing  
377 *Leptospira* species while performing the diagnostic test adds an epidemiological advantage  
378 to the assay over current clinical molecular diagnostic techniques.

379

## 380 **References**

- 381 1. Levett, P. N. Leptospirosis. *Clin. Microbiol. Rev.* **14**, 296–326 (2001).
- 382 2. Collares-Pereira, M. *et al.* First epidemiological data on pathogenic leptospires isolated  
383 on the Azorean islands. *Eur. J. Epidemiol.* **13**, 435–441 (1997).
- 384 3. World Health Organization. Human leptospirosis: guidance for diagnosis, surveillance,  
385 and control. WHO Library, ISBN 924154589 5, 1–107 (2003).
- 386 4. Gonçalves, A. T. *et al.* First isolation of human *Leptospira* strains, Azores, Portugal. *Int.*  
387 *J. Infect. Dis.* **14**, e148–e153, doi: 10.1016/j.ijid.2009.12.004 (2010).
- 388 5. Mérien, F., Amouriaux, P., Perolat, P., Baranton, G. & Saint Girons, I. Polymerase chain  
389 reaction for detection of *Leptospira* spp. in clinical samples. *J. Clin. Microbiol.* **30**,  
390 2219–2224 (1992).



- 391 6. Tong, S. Y. & Giffard, P. M. Microbiological applications of high-resolution melting  
392 analysis. *J. Clin. Microbiol.* **50**, 3418–3421, doi: 10.1128/JCM.01709-12 (2012).
- 393 7. Wittwer, C. T., Reed, G. H., Gundry, C. N., Vandersteen, J. G. & Pryor, R. J. High-  
394 resolution genotyping by amplicon melting analysis using LCGreen. *Clin. Chem.* **49**,  
395 853–860, doi: 10.1373/49.6.853 (2003).
- 396 8. Montgomery, J. L., Sanford, L. N. & Wittwer, C. T. High-resolution DNA melting analysis  
397 in clinical research and diagnostics. *Expert Rev. Mol. Diagn.* **10**, 219–240, doi:  
398 10.1586/erm.09.84 (2010).
- 399 9. Li, B. S. *et al.* Is high resolution melting analysis (HRMA) accurate for detection of  
400 human disease-associated mutations? A meta analysis. *Plos One.* **6**, e28078, doi:  
401 10.1371/journal.pone.0028078 (2011).
- 402 10. Negru, S. *et al.* KRAS, NRAS and BRAF mutations in Greek and Romanian patients  
403 with colorectal cancer: a cohort study. *BMJ Open.* **4**, e004652, doi: 10.1136/bmjopen-  
404 2013-004652 (2014).
- 405 11. Chua, K. H. *et al.* Development of high resolution melting analysis for the diagnosis of  
406 human malaria. *Sci. Rep.* **5**, 15671, doi: 10.1038/srep15671 (2015).
- 407 12. Andini, N. *et al.* Microbial typing by machine learned DNA melt signatures. *Sci. Rep.* **7**,  
408 42097, doi: 10.1038/srep42097 (2017).
- 409 13. Naze, F. Desvars, A., Picardeau, M., Bourhy, P. & Michault, A. Use of new high  
410 resolution melting method for genotyping pathogenic *Leptospira* spp. *Plos One.* **10**,  
411 e0127430, doi: 10.1371/journal.pone.0127430 (2015).
- 412 14. Peláez Sánchez, R. G., Quintero J. Á. L., Pereira, M. M. & Agudelo-Flórez, P. High-  
413 resolution melting curve analysis of the 16S ribosomal gene to detect and identify  
414 pathogenic and saprophytic *Leptospira* species in colombian isolates. *Am. J. Trop. Med.*  
415 *Hyg.* **96**, 1031–1038, doi: 10.4269/ajtmh.16-0312 (2017).

- 416 15. Esteves, L. *et al.* Human leptospirosis: seroreactivity and genetic susceptibility in the  
417 population of São Miguel Island (Azores, Portugal). *Plos One*. **9**, e108534, doi:  
418 10.1371/journal.pone.0108534 (2014).
- 419 16. Vieira, M. L., Gama-Simões, M. J. & Collares-Pereira, M. Human leptospirosis in  
420 Portugal: a retrospective study of eighteen years. *Int. J. Infect. Dis.* **10**, 378–386, doi:  
421 10.1016/j.ijid.2005.07.006 (2006).
- 422 17. STARD Group. STARD 2015: an updated list of essential items for reporting diagnostic  
423 accuracy studies. *BMJ*. **351**, h5527, doi: 10.1136/bmj.h5527 (2015).
- 424 18. Ko, A.I., Goarant C. & Picardeau M. *Leptospira*: the dawn of the molecular genetics era  
425 for an emerging zoonotic pathogen. *Nat. Rev. Microbiol.* **10**, 736–747, doi:  
426 10.1038/nrmicro2208 (2009).
- 427 19. Goris, M. G. & Hartskeerl R. A. Leptospirosis serodiagnosis by the microscopic  
428 agglutination test. *Curr. Protoc. Microbiol.* **32**, Unit 12E 15 (2014).
- 429 20. Courdurie, C., Le Govic, Y., Bourhy, P., Alexer, D. & Pailla, K. Evaluation of different  
430 serological assays for early diagnosis of leptospirosis in Martinique (French West  
431 Indies). *PLoS Negl. Trop. Dis.* **11**, e0005678, doi: 10.1371/journal.pntd.0005678 (2017).
- 432 21. Collares-Pereira, M., Santos-Reis M., Gonçalves, L., Vieira, M. L. & Flor, L.  
433 Epidemiology and control of leptospirosis in the Azores project. Final scientific report.  
434 USA Scientific Cooperative Agreement No. 58–401–3–F185, 2003–2008 (2008).
- 435 22. Villumsen, S. *et al.* Novel TaqMan PCR for detection of *Leptospira* species in urine and  
436 blood: pit-falls of in silico validation. *J. Microbiol. Methods.* **91**, 184–190, doi:  
437 10.1016/j.mimet.2012.06.009 (2012).
- 438 23. Mohd, M. R. *et al.* Development and validation of pan-*Leptospira* Taqman qPCR for the  
439 detection of *Leptospira* spp. in clinical specimens. *Mol. Cell. Probes.* S0890-  
440 8508(17)30127-5 (2018).

- 441 24. Waggoner, J.J. et al. Sensitive real-time PCR detection of pathogenic *Leptospira* spp.  
442 and a comparison of nucleic acid amplification methods for the diagnosis of  
443 leptospirosis. *Plos One*. **9**, e112356, doi: 10.1371/journal.pone.0112356 (2014).
- 444 25. Smythe, L.D. et al. A quantitative PCR (TaqMan) assay for pathogenic *Leptospira* spp.  
445 *BMC Infect. Dis.* **2**, 13, doi: 10.1186/1471-2334-2-13 (2002).
- 446 26. Riediger, I.N. et al. Rapid, actionable diagnosis of urban epidemic leptospirosis using a  
447 pathogenic *Leptospira* lipL32-based real-time PCR assay. *PLoS Negl. Trop. Dis.* **9**,  
448 e0005940, doi: 10.1371/journal.pntd.0005940 (2017).
- 449 27. Stoddard, R.A., Gee, J.E., Wilkins, P.P., McCaustland, K. & Hoffmaster, A.R. Detection  
450 of pathogenic *Leptospira* spp. through TaqMan polymerase chain reaction targeting the  
451 LipL32 gene. *Diagn. Microbiol. Infect. Dis.* **3**, 247–55, doi:  
452 10.1016/j.diagmicrobio.2009.03.014 (2009).
- 453 28. Backstedt, B.T. et al. Efficient detection of pathogenic leptospires using 16S ribosomal  
454 RNA. *PLoS One*. **10**, e0128913, doi: 10.1371/journal.pone.0128913 (2015).
- 455 29. Ahmed, A., Engelberts, M.F., Boer, K.R., Ahmed, N. & Hartskeerl, R.A. Development  
456 and validation of a real-time PCR for detection of pathogenic *Leptospira* species in  
457 clinical materials. *PLoS One*. **4**, e7093, doi: 10.1371/journal.pone.0007093 (2009).
- 458 30. Merien, F. et al. A rapid and quantitative method for the detection of *Leptospira* species  
459 in human leptospirosis. *FEMS Microbiol. Lett.* **249**, 139–47 (2005).
- 460 31. Dittrich, S. et al. A prospective hospital study to evaluate the diagnostic accuracy of  
461 rapid diagnostic tests for the early detection of leptospirosis in Laos. *Am. J. Trop. Med.*  
462 *Hyg.* [Epub ahead of print], doi: 10.4269/ajtmh.17-0702 (2018).
- 463 32. Nabity, S.A. et al. Prospective evaluation of accuracy and clinical utility of the Dual Path  
464 Platform (DPP) assay for the point-of-care diagnosis of leptospirosis in hospitalized

465 patients. *PLoS Negl. Trop. Dis.* **12**, e0006285, doi: 10.1371/journal.pntd.0006285  
466 (2018).

467 33. Niloofa, R. et al. Diagnosis of leptospirosis: comparison between Microscopic  
468 Agglutination Test, IgM-ELISA and IgM Rapid Immunochromatography Test. *PLoS One.*  
469 **10**, e0129236, doi: 10.1371/journal.pone.0129236 (2015).

470

#### 471 **Acknowledgements**

472 The present work was supported by grants from the Direção Regional da Ciência e  
473 Tecnologia (M121/I/OLD/2002, from the Azores Government) and BioISI (Centre  
474 Reference: UID/MULTI/04046/2013) from FCT/MCTES/PIDDAC, Portugal. The authors  
475 would like to thank Rúben Neves, a Ph.D. student at Clark University, for revising the  
476 English language of the manuscript.

477

#### 478 **Author Contributions**

479 L.M.E. and L.M.V. designed the study and wrote the manuscript, L.M.V. provided materials  
480 and reagents, M.L.V. provided the *Leptospira* strains and human isolates, M.L.V. and T.C.  
481 performed and analysed the MAT experiments, L.M.E. performed and analysed the HRM  
482 experiments, S.M.B. performed and analysed the sequencing experiments, C.C.B. tested  
483 and calibrated High Resolution Melt software v3.0.1 (Applied Biosystems), and M.G.S.  
484 provided critical reading and editing of the manuscript. All authors read, edited and  
485 approved the final manuscript.

486

#### 487 **Data availability**

488 All data generated or analysed during this study are included in this published article and  
489 the Supplementary Information files.

490

491 **Additional Information**

492 **Supplementary information** accompanies this paper.

493

494 **Competing financial interests.** The authorities who provided funding for this project had

495 no role in the study design, data collection and analysis, decision to publish, or preparation

496 of the manuscript.

497 **Figure legends**

498 **Figure 1. High resolution melting curve analysis profiles of cultured *Leptospira* spp.,**  
499 **and *Leptospira* isolates from human leptospirosis patients. (a)** HRM profiles using the  
500 LFB1 primer pair; **(b)** HRM profiles using the G1/G2 primer pair. Abbreviations: HI1, Human  
501 isolate 1; HI6, Human isolate 6.

502

503 **Figure 2. High resolution melting curve analysis profiles of human clinical samples**  
504 **(serum and urine) from patients with suspected leptospirosis. (a)** HRM profiles using  
505 the LFB1 primer pair; **(b)** HRM profiles using the G1/G2 primer pair.

506

507 **Figure 3. Confirmation of the HRM analysis by Sanger sequencing.** Alignment of the  
508 consensus sequences of the clinical samples, *Leptospira* spp. and human isolates. Only the  
509 sequences showing differences from the first sequence are shown. Nucleotides identical to  
510 those in the first sequence are indicated by dots.

511 **Tables**

| Patients<br>(N = 202)              | Conventional nested PCR |      |          |      | HRM (primers) |      |          |      |          |      |          |      |
|------------------------------------|-------------------------|------|----------|------|---------------|------|----------|------|----------|------|----------|------|
|                                    |                         |      |          |      | LFB1          |      |          |      | G1/G2    |      |          |      |
|                                    | Positive                |      | Negative |      | Positive      |      | Negative |      | Positive |      | Negative |      |
|                                    | N                       | %    | N        | %    | N             | %    | N        | %    | N        | %    | N        | %    |
| Total                              | 47                      | 23.3 | 155      | 76.7 | 46            | 22.7 | 156      | 77.3 | 46       | 22.7 | 156      | 77.3 |
| <b>Duplicate samples (N = 808)</b> |                         |      |          |      |               |      |          |      |          |      |          |      |
| <b>Serum</b>                       |                         |      |          |      |               |      |          |      |          |      |          |      |
| S1                                 | 33                      | 16.3 | 169      | 83.7 | 32            | 15.8 | 170      | 84.2 | 33       | 16.3 | 169      | 83.7 |
| S2                                 | 34                      | 16.8 | 168      | 83.2 | 26            | 12.9 | 176      | 87.1 | 30       | 14.9 | 172      | 85.1 |
| <b>Urine</b>                       |                         |      |          |      |               |      |          |      |          |      |          |      |
| U1                                 | 35                      | 17.3 | 167      | 82.7 | 27            | 13.4 | 175      | 86.6 | 30       | 14.9 | 172      | 85.1 |
| U2                                 | 30                      | 14.9 | 172      | 85.2 | 25            | 12.4 | 177      | 87.6 | 25       | 12.4 | 177      | 87.6 |

**Table 1. Molecular characterization of 202 patients with suspected clinical leptospirosis.** Duplicate serum and urine samples were investigated by conventional nested PCR and HRM methods.

512

513

| Kinetics of <i>Leptospira</i> infection        |                            |           | <i>Leptospira</i> detection methods |      |               |      |       |      |     |      |
|------------------------------------------------|----------------------------|-----------|-------------------------------------|------|---------------|------|-------|------|-----|------|
|                                                |                            |           | Conventional nested PCR (16S RNA)   |      | HRM (primers) |      |       |      | MAT |      |
|                                                |                            |           |                                     |      | LFB1          |      | G1/G2 |      |     |      |
| Molecular profiles                             | Phases                     | Kinetics  | N                                   | %    | N             | %    | N     | %    | N   | %    |
| Positive patients (after Sanger sequencing)    |                            |           | 46                                  | 100  | 46            | 100  | 46    | 100  | 6   | 13.0 |
| Profile A: Blood (serum + / urine -)           | Incubation                 | Onset     | 8                                   | 17.4 | 16            | 34.8 | 14    | 30.4 | 0   | 0.0  |
| Profile B: Blood and urine (serum + / urine +) | Early                      | Clearance | 28                                  | 60.9 | 18            | 39.1 | 22    | 47.8 | 2   | 4.3  |
| Profile C: Urine (serum - / urine +)           | Late (kidney colonization) | Excretion | 10                                  | 21.7 | 12            | 26.1 | 10    | 21.7 | 4   | 8.5  |

**Table 2. Molecular profiles of patients with laboratory-confirmed leptospirosis and the corresponding disease kinetics.**  $P > 0.05$ , conventional nested PCR compared with HRM;  $P < 0.0001$ , HRM compared with MAT.

514

515

516

517

518  
519  
520  
521  
522  
523  
524  
525  
526  
527

| Kinetics of <i>Leptospira</i> infection |                                  | Serovar                                                                  | Species                  |
|-----------------------------------------|----------------------------------|--------------------------------------------------------------------------|--------------------------|
| Profiles                                | Conventional nested PCR (N = 46) | MAT                                                                      | HRM                      |
| C                                       | 1                                | Positive (co-agglutination – highest titre 1:1280 against Arb A and Cyn) | <i>L. borgpetersenii</i> |
|                                         | 1                                | Positive (Arb A 1:160)                                                   | <i>L. borgpetersenii</i> |
|                                         | 1                                | Positive (co-agglutination – highest titre 1:320 against Arb A 1:320)    | <i>L. interrogans</i>    |
|                                         | 1                                | NC                                                                       | <i>L. borgpetersenii</i> |
|                                         | 6                                | Negative                                                                 | <i>L. interrogans</i>    |
| B                                       | 1                                | NC                                                                       | <i>L. interrogans</i>    |
|                                         | 1                                | NC                                                                       | <i>L. interrogans</i>    |
|                                         | 16                               | Negative                                                                 | <i>L. interrogans</i>    |
|                                         | 10                               | Negative                                                                 | <i>L. borgpetersenii</i> |
| A                                       | 3                                | Negative                                                                 | <i>L. interrogans</i>    |
|                                         | 5                                | Negative                                                                 | <i>L. borgpetersenii</i> |

528  
529  
530  
531  
532

**Table 3. MAT results from the 46 patients with laboratory-confirmed leptospirosis.** Abbreviations: Arb A [serovar Arborea (Azorean isolate) serogroup Ballum]; Cyn [Cynopteri (reference serovar) serogroup Cynopteri]; NC, not conclusive (specific reactivity below the cut-off of 1:160 adopted in the Azorean endemic region).

| Patients (N = 202)              | HRM             |           |
|---------------------------------|-----------------|-----------|
|                                 | Estimated value | 95% CI    |
| Sensitivity                     | 1.00            | 0.90–1.00 |
| Specificity                     | 1.00            | 0.97–1.00 |
| Positive predictive value (PPV) | 1.00            | 0.90–1.00 |
| Negative predictive value (NPV) | 1.00            | 0.97–1.00 |
| Accuracy (%)                    | 100             | –         |

533

**Table 4. Diagnostic accuracy of HRM analysis compared with conventional nested PCR for detecting human leptospirosis infection.** Abbreviation: CI, confidence interval.



| Patients (N)                 | Clinical samples |           | Leptospira                                     |                             |                        | Diagnostic accuracy                                                         |                                                                              |                                             |                                             | Country (geographic area)        | Paper (year)                          |
|------------------------------|------------------|-----------|------------------------------------------------|-----------------------------|------------------------|-----------------------------------------------------------------------------|------------------------------------------------------------------------------|---------------------------------------------|---------------------------------------------|----------------------------------|---------------------------------------|
|                              | Serum (N)        | Urine (N) | Detection method                               | Molecular target            | Strains identified (N) | Sensitivity                                                                 | Specificity                                                                  | Positive Predictive Value (PPV)             | Negative Predictive Value (NPV)             |                                  |                                       |
| <b>Molecular PCR methods</b> |                  |           |                                                |                             |                        |                                                                             |                                                                              |                                             |                                             |                                  |                                       |
| 202                          | 202*             | 202*      | High Resolution Melting (HRM)                  | <i>lfb1</i> and <i>secy</i> | 4                      | 100 (90-100)                                                                | 100 (97-100)                                                                 | 100 (90-100)                                | 100 (97-100)                                | Portugal (Azores Islands)        | Current study                         |
| 42                           | 42               | 0         | High Resolution Melting (HRM)                  | <i>lfb1</i> and <i>secy</i> | 49                     | NR                                                                          | NR                                                                           | NR                                          | NR                                          | France (Reunion Island)          | Naze F et al 2015 <sup>13</sup>       |
| 58                           | 0                | 58        | Taqman qPCR                                    | <i>lipL32</i><br>16S rRNA   | 29                     | NR                                                                          | 100 (88-100)<br>97 (83-99)                                                   | NR                                          | NR                                          | Denmark                          | Villumsen S et al 2012 <sup>22</sup>  |
| 65                           | 65               | 0         | Taqman qPCR                                    | <i>rrs</i>                  | 31                     | NR                                                                          | NR                                                                           | NR                                          | NR                                          | Malaysia                         | Mohd Ali MR et al. 2018 <sup>23</sup> |
| 63                           | 63               | 0         | Taqman qPCR                                    | 16S rRNA                    | 23                     | NR                                                                          | NR                                                                           | NR                                          | NR                                          | USA                              | Waggoner JJ et al 2014 <sup>24</sup>  |
| 67                           | 66               | 1         | Taqman qPCR                                    | 16S rRNA                    | 29                     | NR                                                                          | NR                                                                           | NR                                          | NR                                          | Australia                        | Smythe LD et al 2002 <sup>25</sup>    |
| 150                          | 150              | 0         | Taqman qPCR                                    | <i>lipL32</i>               | 1                      | 29.1 (21.6–38.0)                                                            | NR                                                                           | NR                                          | NR                                          | Brazil (Salvador and Curitiba)   | Riediger IN et al 2017 <sup>26</sup>  |
| 7                            | 7                | 1         | Taqman qPCR                                    | <i>lipL32</i>               | 22                     | 100                                                                         | 100                                                                          | NR                                          | NR                                          | USA                              | Stoddard RA et al 2009 <sup>27</sup>  |
| 25                           | 25               | 0         | SYBR Green-based qRT-PCR                       | 16S rRNA                    | 22                     | NR                                                                          | NR                                                                           | NR                                          | NR                                          | USA                              | Backstedt BT et al 2015 <sup>28</sup> |
| 133                          | 133              | 0         | SYBR Green-based qRT-PCR                       | <i>secy</i>                 | 56                     | 100 (70–100)                                                                | 100 (93–100)                                                                 | NR                                          | NR                                          | The Netherlands                  | Ahmed A et al 2009 <sup>29</sup>      |
| 61                           | 61               | 0         | SYBR Green-based qRT-PCR                       | <i>lfb1</i>                 | 24                     | NR                                                                          | NR                                                                           | NR                                          | NR                                          | France                           | Merien F et al 2005 <sup>30</sup>     |
| <b>Serological methods</b>   |                  |           |                                                |                             |                        |                                                                             |                                                                              |                                             |                                             |                                  |                                       |
| 695                          | 695              | 0         | Test-it Leptorapide Dual Path Platform SD-IgM  | IgM<br>IgM<br>IgM<br>IgM    | 0                      | 71.0 (41.9–91.6)<br>47.4 (24.5–71.1)<br>35.0 (15.4–59.2)<br>21.1 (6.1–45.6) | 64.6 (59.8–69.3)<br>77.2 (73.1–80.9)<br>62.1 (57.7–66.4)<br>94.8 (92.6–96.7) | NR                                          | NR                                          | Laos                             | Dittrich S et al. 2018 <sup>31</sup>  |
| 98                           | 98               | 0         | Dual Path Platform IgM-ELISA                   | IgM + IgG<br>IgM            | 0                      | 85.2 (66.3-95.7)<br>80.8 (60.7-93.5)                                        | 87.2 (74.2-95.1)<br>100.0 (92.2-100.0)                                       | 79.3 (60.3-92.0)<br>100.0 (83.9-100.0)      | 91.1 (78.8-97.5)<br>90.2 (78.6-96.7)        | Brazil (Salvador)                | Nabity SA et al. 2018 <sup>32</sup>   |
| 103                          | 103              | 0         | ELISA Serion ELISA-Hb Pasteur GenBio ImmunoDOT | IgM<br>IgM<br>IgM           | 68                     | 75 (66–83)<br>67 (57–75)<br>69 (59–76)                                      | 92 (85–95)<br>98 (94–100)<br>100 (97–100)                                    | NR                                          | NR                                          | France (Martinique, West Indies) | Courdurie C et al. 2017 <sup>20</sup> |
| 888                          | 888              | 0         | MAT ELISA Serion Leptocheck-WB                 | Ig<br>IgM<br>IgM            | 0                      | 100<br>80.2 (75.6–84.2)<br>80.8 (76.2–84.7)                                 | 100<br>88.5 (85.4–91.1)<br>76.9 (73.0–80.4)                                  | 100<br>82.6 (78.0–86.3)<br>70.3 (65.5–74.6) | 100<br>86.9 (83.7–89.6)<br>85.6 (82.0–88.5) | Sri Lanka                        | Nillofa R et al 2015 <sup>33</sup>    |

**Table 5. Comparison between molecular and serological assays for the diagnosis of leptospirosis.** \*Analysed in duplicated; NR, not reported.

**a**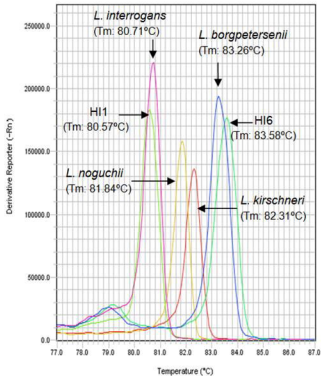**b**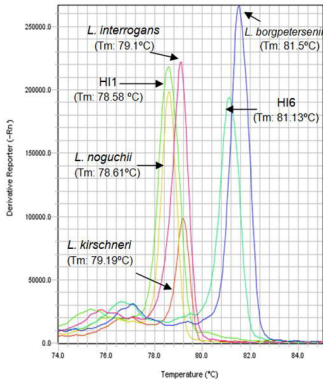

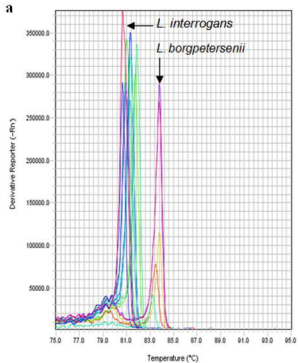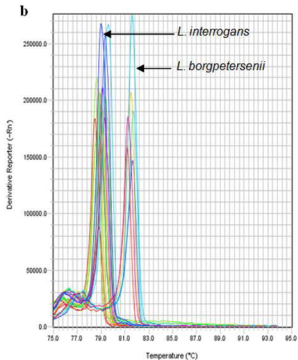

Source: https://www.biorxiv.org/content/biorxiv/early/2018/05/02/311142.full.pdf
